# Supplementary material for: Three-dimensional potassium niobate nanoarray on vermiculite for high-performance photocatalyst fabricated by an in situ hydrothermal process
Source: Royal Society of Chemistry journal article supplement (doi:10.1039/c6ra06959b), 2016-01-01
Supplement: c6ra06959b1.pdf [file c6ra06959b1.pdf]

## Supporting Information for

### **Three-Dimensional Potassium Niobate Nanoarray on Vermiculite for High-performance Photocatalyst Fabricated by an *in situ* Hydrothermal process**

Yuwei Wang,<sup>a</sup> Xianggui Kong,<sup>a,\*</sup> Weiliang Tian,<sup>a</sup> Deqiang Lei<sup>b</sup> and Xiaodong Lei<sup>a,\*</sup>

<sup>a</sup>State Key Laboratory of Chemical Resource Engineering, Beijing University of Chemical Technology, Beijing 100029, China. Tel.: +86-10-64455357. Fax: +86-10-64425385. E-mail address: leixd@mail.buct.edu.cn; kongxg@mail.buct.edu.cn.

<sup>b</sup>Department of Neurosurgery, Union Hospital, Tongji Medical College, Huazhong University of Science and Technology, Wuhan 430022, China.

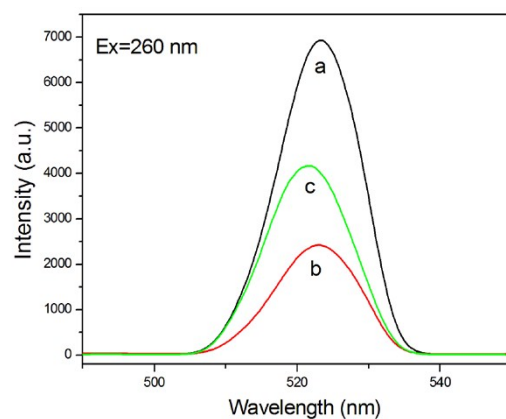

**Fig. S1.** PL spectra of VMT (a), KNbO<sub>3</sub> (b) and KNbO<sub>3</sub>/VMT (c) with the excitation wavelength of 260 nm.

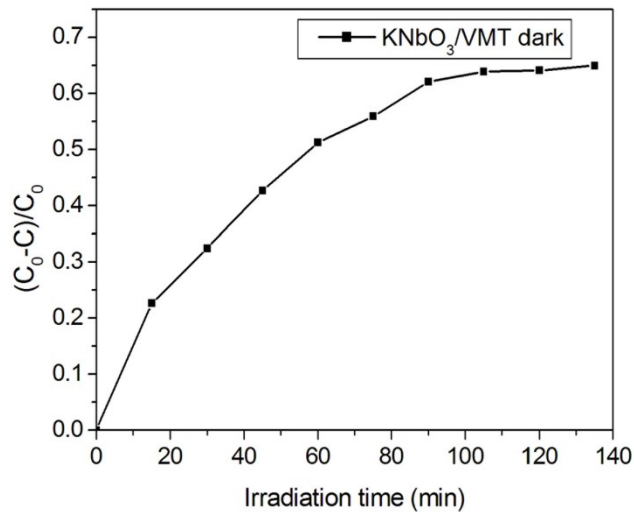

**Fig. S2.** The MB adsorption percentages over the KNbO<sub>3</sub>/VMT composite in the dark. The initial MB concentration was 10 mg/L and the amount of the catalyst was 0.3 g.

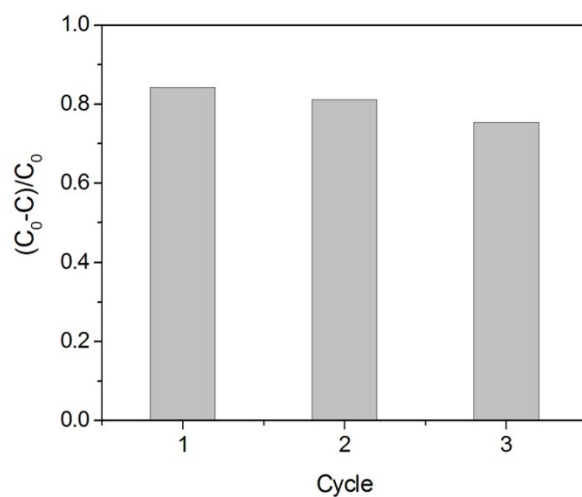

**Fig. S3.** Photocatalytic degradation profiles of MB after three consecutive catalytic cycles. The initial MB concentration was 20 mg/L and the amount of the catalyst was 0.3 g.

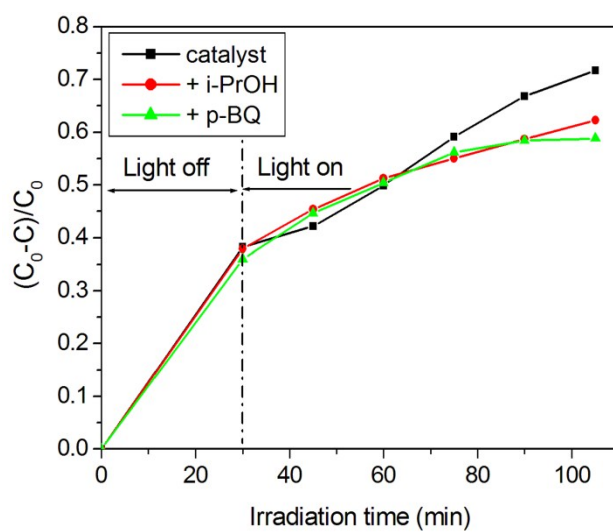

**Fig. S4.** Degradation kinetics of MB ( $C_0=10$  mg/L) in the presence of scavengers under visible light.

**Table S1.** The mass loading of KNbO<sub>3</sub> on VMT with the hydrothermal time prolonged.

| Time (h)         | 8     | 9     | 10    | 12    |
|------------------|-------|-------|-------|-------|
| Mass loading (%) | 3.37% | 3.56% | 7.52% | 9.85% |

**Table S2.** BET surface areas of VMT, KNbO<sub>3</sub> and KNbO<sub>3</sub>/VMT.

| Sample                          | VMT    | KNbO <sub>3</sub> | KNbO <sub>3</sub> /VMT |
|---------------------------------|--------|-------------------|------------------------|
| BET surface (m <sup>2</sup> /g) | 15.444 | 6.617             | 12.905                 |
